# Supplementary material for: UPLC-MS-ESI-QTOF Analysis and Antifungal Activity of Aqueous Extracts of Spondias tuberosa
Source: MDPI journal article supplement (doi:10.3390/molecules28010305), 2022-12-30
Supplement: s1 [file s1]

## Supplementary material

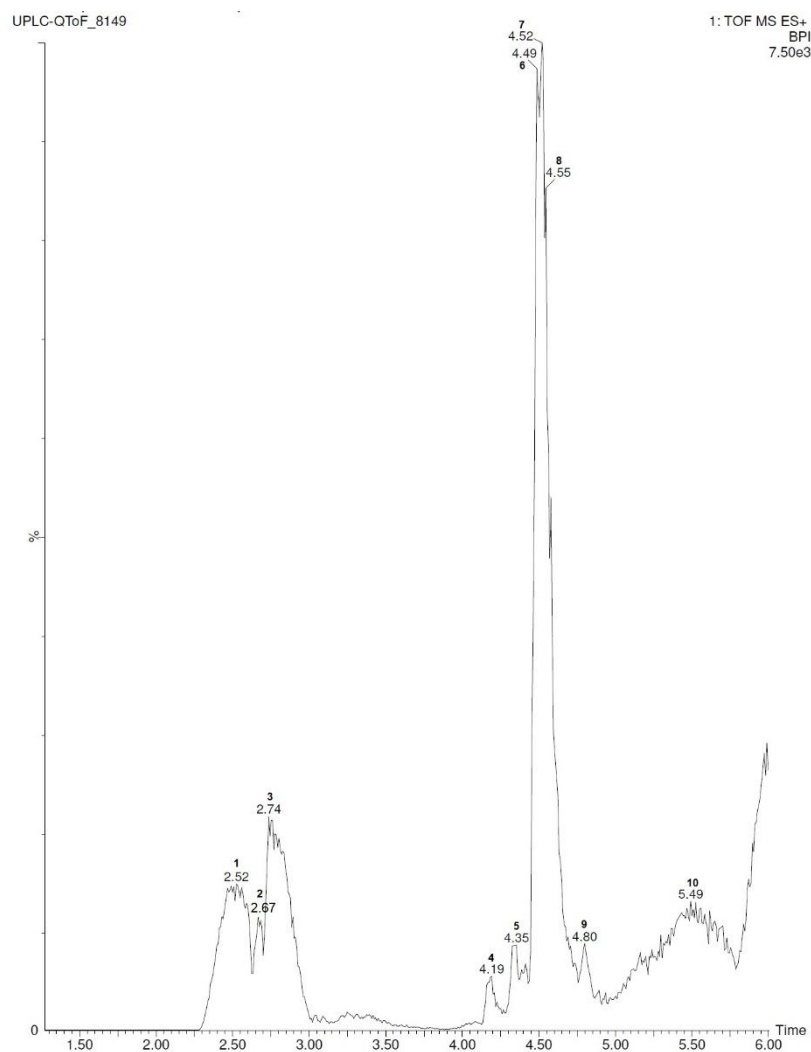

**Figure S1** - High Definition Mass Spectrometry (UPLC-MS) Chromatogram of the Aqueous Extract of Leaves from *Spondias tuberosa* in the Positive Ionic Mode.

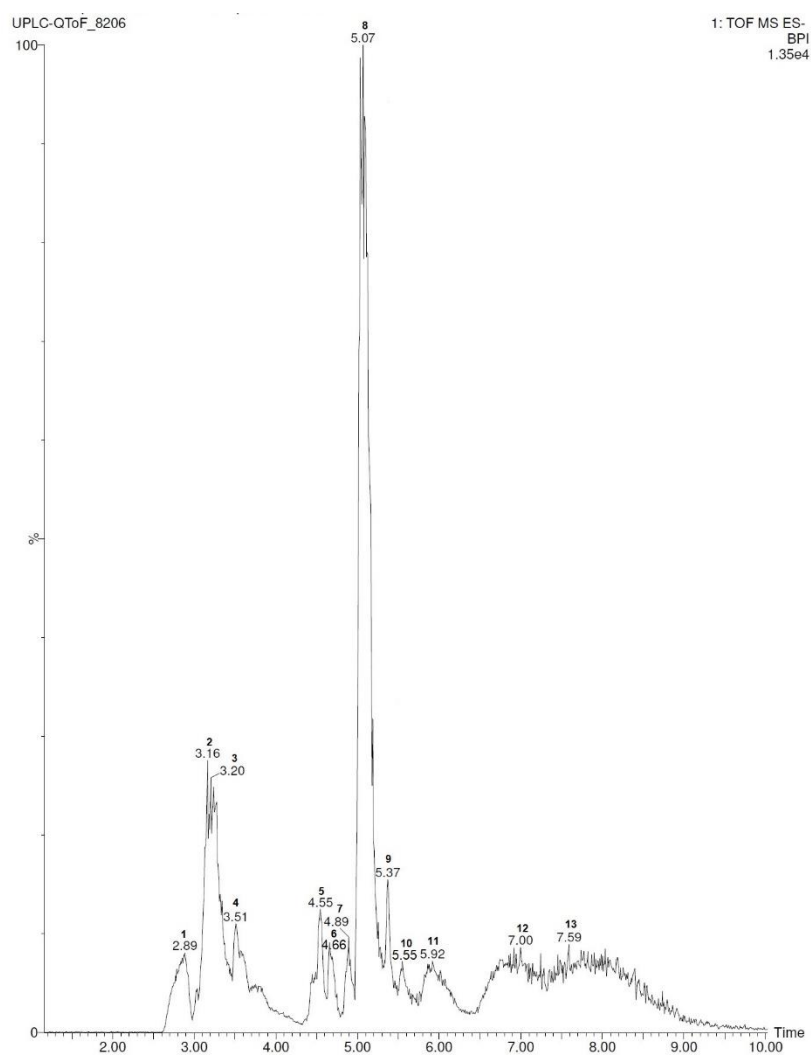

**Figure S2** - High Definition Mass Spectrometry (UPLC-MS) Chromatogram of the Aqueous Extract of Roots from *Spondias tuberosa* in the Negative Ionic Mode.
